# Supplementary material for: Highly active, ultra-low loading single-atom iron catalysts for catalytic transfer hydrogenation
Source: PubMed Central journal article supplement (PMC10589291; doi:10.1038/s41467-023-42337-9), 2023-10-20
Supplement: 41467_2023_42337_MOESM3_ESM.pdf [file 41467_2023_42337_MOESM3_ESM.pdf]

## **Description of Additional Supplementary Files**

**File Name:** Supplementary Data 1

**Description:** The supplementary data file of “**Supplementary Data 1**” included the cartesian coordinates of all calculated species (In Angstrom) for  $pK_a$  prediction.
