# Supplementary material for: Highly active, ultra-low loading single-atom iron catalysts for catalytic transfer hydrogenation
Source: PubMed Central journal article supplement (PMC10589291; doi:10.1038/s41467-023-42337-9), 2023-10-20
Supplement: 41467_2023_42337_MOESM4_ESM.pdf [file 41467_2023_42337_MOESM4_ESM.pdf]

## Supplementary Data 1. Cartesian Coordinates of All Calculated Species (In

Angstrom)

**a1**

|   |             |             |             |
|---|-------------|-------------|-------------|
| C | -0.00247900 | 0.04553900  | 0.36251800  |
| H | 0.00796200  | 0.08774300  | 1.46843000  |
| O | 0.10251500  | 1.35882900  | -0.16547900 |
| H | 0.95629900  | 1.72144300  | 0.10524000  |
| C | -1.34241300 | -0.50341600 | -0.08815700 |
| H | -1.37574800 | -0.55844100 | -1.18739700 |
| H | -1.51084300 | -1.51031200 | 0.31846600  |
| H | -2.15924500 | 0.15084900  | 0.24938200  |
| C | 1.15959700  | -0.81805600 | -0.10180500 |
| H | 2.11855700  | -0.39148300 | 0.23108200  |
| H | 1.08378300  | -1.83735800 | 0.30447700  |
| H | 1.17088600  | -0.87746900 | -1.20118400 |

**a1...(*i*PrOH)**

|   |             |             |             |
|---|-------------|-------------|-------------|
| C | -2.21519000 | -0.21035900 | -0.31804200 |
| H | -2.48150600 | -0.59468500 | -1.31897600 |
| O | -1.20736900 | 0.79180200  | -0.45989100 |
| H | -1.55223300 | 1.51168700  | -1.00738100 |
| C | -1.59860200 | -1.33327600 | 0.49258400  |
| H | -1.33377700 | -0.97326600 | 1.49919200  |
| H | -2.30433700 | -2.16896000 | 0.59679800  |
| H | -0.68741800 | -1.70035900 | -0.00134700 |
| C | -3.45346000 | 0.37653900  | 0.33522600  |
| H | -3.86217900 | 1.19994900  | -0.27012400 |
| H | -4.23716800 | -0.38751000 | 0.44113600  |
| H | -3.20565600 | 0.76733900  | 1.33397000  |
| C | 1.94939200  | -0.09920400 | 0.21917700  |
| H | 1.40244100  | -0.61480100 | 1.03392400  |
| O | 1.27268500  | -0.30198900 | -1.00794900 |
| H | 0.39397100  | 0.11615700  | -0.92419000 |
| C | 3.32311700  | -0.73011000 | 0.09092500  |
| H | 3.89184000  | -0.23298800 | -0.71061700 |
| H | 3.88800300  | -0.63904500 | 1.02956000  |
| H | 3.23515600  | -1.79726700 | -0.16049300 |
| C | 2.02757700  | 1.38267200  | 0.55943700  |
| H | 1.01640100  | 1.80799600  | 0.64482800  |
| H | 2.55000000  | 1.54485300  | 1.51390400  |
| H | 2.56693400  | 1.92482900  | -0.23330100 |

**a1... (2 <sup>i</sup>PrOH)**

|   |             |             |             |
|---|-------------|-------------|-------------|
| C | 0.17784200  | 2.52625500  | 0.05235200  |
| H | -0.56281200 | 3.33126200  | -0.09629600 |
| O | -0.08622400 | 1.48973300  | -0.90497800 |
| H | 0.04636300  | 1.84045500  | -1.79924600 |
| C | -0.02481400 | 1.90496500  | 1.41893000  |
| H | 0.69975400  | 1.08934400  | 1.56711400  |
| H | 0.12164100  | 2.65409800  | 2.20926300  |
| H | -1.04432000 | 1.50084800  | 1.50365800  |
| C | 1.57618200  | 3.08195700  | -0.14505100 |
| H | 1.69203700  | 3.49717200  | -1.15795100 |
| H | 1.77371200  | 3.88788500  | 0.57624100  |
| H | 2.32343600  | 2.28703500  | -0.00248400 |
| C | -2.43604900 | -0.73977300 | 0.09822500  |
| H | -1.82344800 | -0.69976400 | 1.02147400  |
| O | -2.67285700 | 0.57753800  | -0.36534000 |
| H | -1.81214000 | 0.94104400  | -0.64305600 |
| C | -3.78021600 | -1.35150000 | 0.44568300  |
| H | -4.41352000 | -1.40716300 | -0.45359700 |
| H | -3.65847000 | -2.36559900 | 0.85219500  |
| H | -4.29943500 | -0.73640000 | 1.19516100  |
| C | -1.68179800 | -1.55326000 | -0.94459300 |
| H | -0.72062900 | -1.07154000 | -1.18488300 |
| H | -1.47583000 | -2.57260700 | -0.58466000 |
| H | -2.27391600 | -1.62055800 | -1.87124900 |
| C | 2.01510300  | -1.61264000 | -0.18282900 |
| H | 1.46406900  | -2.11255700 | -1.00289600 |
| O | 2.13476400  | -0.22940000 | -0.46451300 |
| H | 1.25358000  | 0.15973100  | -0.60591400 |
| C | 3.42087600  | -2.18196800 | -0.13330900 |
| H | 3.99583300  | -1.69040000 | 0.66709300  |
| H | 3.40173400  | -3.26303100 | 0.06486100  |
| H | 3.94073300  | -2.01063000 | -1.08708900 |
| C | 1.26019600  | -1.84615800 | 1.11734900  |
| H | 0.26506200  | -1.37787600 | 1.07884300  |
| H | 1.12198600  | -2.92109000 | 1.30843100  |
| H | 1.81518000  | -1.40989500 | 1.96308700  |

**b1**

|   |             |             |             |
|---|-------------|-------------|-------------|
| C | 0.00001100  | 0.17022500  | 0.33186600  |
| H | 0.00004100  | 0.10396000  | 1.47389000  |
| O | 0.00007500  | 1.42188500  | -0.14766700 |
| C | -1.25456900 | -0.63374700 | -0.08638800 |
| H | -1.28726800 | -0.70194900 | -1.18833000 |

|   |             |             |             |
|---|-------------|-------------|-------------|
| H | -1.29457900 | -1.65504200 | 0.33101200  |
| H | -2.15861200 | -0.09021200 | 0.23380100  |
| C | 1.25450000  | -0.63385800 | -0.08639500 |
| H | 2.15855300  | -0.09004900 | 0.23329500  |
| H | 1.29473600  | -1.65495000 | 0.33147600  |
| H | 1.28688800  | -0.70255800 | -1.18831100 |

### **b1...(*i*PrOH)**

|   |             |             |             |
|---|-------------|-------------|-------------|
| C | 1.82895600  | 0.09134200  | 0.17301900  |
| H | 1.34295300  | 0.53521600  | 1.08342500  |
| O | 1.02307400  | 0.19685700  | -0.93936900 |
| C | 2.13030300  | -1.37154700 | 0.52726500  |
| H | 2.63163700  | -1.86212400 | -0.32419700 |
| H | 2.77299700  | -1.47117200 | 1.41734600  |
| H | 1.18867700  | -1.90800100 | 0.71997600  |
| C | 3.13454500  | 0.86293900  | -0.03607300 |
| H | 2.91708700  | 1.91913900  | -0.25999400 |
| H | 3.79970500  | 0.82345100  | 0.84157100  |
| H | 3.67248900  | 0.44340900  | -0.90289100 |
| C | -2.04533400 | 0.14309800  | -0.31508800 |
| H | -2.18633300 | 0.54550800  | -1.34633400 |
| O | -1.07067600 | -0.85254900 | -0.30121800 |
| H | -0.11256500 | -0.39176300 | -0.62721700 |
| C | -3.37889300 | -0.45162000 | 0.12092500  |
| H | -3.29541000 | -0.83808800 | 1.15002100  |
| H | -4.19132600 | 0.29059500  | 0.09153500  |
| H | -3.65134200 | -1.29344700 | -0.53392300 |
| C | -1.65057300 | 1.32623200  | 0.56918000  |
| H | -0.68636100 | 1.72760800  | 0.22461100  |
| H | -2.40099800 | 2.13208500  | 0.54223400  |
| H | -1.53440900 | 0.99045600  | 1.61316100  |

### **b1...(*2*<sup>*i*</sup>PrOH)**

|   |             |            |             |
|---|-------------|------------|-------------|
| C | 0.42893000  | 2.34060000 | -0.37410400 |
| H | -0.09647800 | 2.99694100 | -1.11092000 |
| O | 0.04941400  | 1.01813900 | -0.54020300 |
| C | 0.03576200  | 2.84999900 | 1.01609700  |
| H | 0.59336000  | 2.29898200 | 1.79239900  |
| H | 0.23491800  | 3.92604100 | 1.14514600  |
| H | -1.03795700 | 2.67037600 | 1.18109900  |
| C | 1.92689600  | 2.52726900 | -0.61944500 |
| H | 2.19887900  | 2.15416000 | -1.61910200 |
| H | 2.22596500  | 3.58563300 | -0.55441500 |
| H | 2.51074800  | 1.95846000 | 0.12238600  |

|   |             |             |             |
|---|-------------|-------------|-------------|
| C | -2.45337900 | -0.60497900 | 0.21079500  |
| H | -1.80769700 | -0.64680900 | 1.11521000  |
| O | -2.41605500 | 0.68233600  | -0.34670500 |
| H | -1.40630600 | 0.87283400  | -0.48588300 |
| C | -3.87988900 | -0.91481200 | 0.63578400  |
| H | -4.54548900 | -0.88826100 | -0.24221600 |
| H | -3.95845900 | -1.90845600 | 1.10141200  |
| H | -4.23832000 | -0.16331500 | 1.35535000  |
| C | -1.92599300 | -1.63881500 | -0.78281400 |
| H | -0.89401700 | -1.39255200 | -1.07779500 |
| H | -1.93333300 | -2.65633200 | -0.36088900 |
| H | -2.55159100 | -1.63432400 | -1.69061700 |
| C | 1.68657300  | -1.60346400 | 0.23537100  |
| H | 0.66157300  | -1.86405600 | 0.57714900  |
| O | 1.62506700  | -0.88521900 | -0.96962000 |
| H | 1.01984600  | -0.06592800 | -0.81463400 |
| C | 2.43431300  | -2.90232700 | -0.02194300 |
| H | 3.45615400  | -2.68158900 | -0.37036600 |
| H | 2.50107900  | -3.51959900 | 0.88606600  |
| H | 1.92772400  | -3.48650000 | -0.80489200 |
| C | 2.34032300  | -0.78227900 | 1.34280100  |
| H | 1.76583700  | 0.14228600  | 1.50113300  |
| H | 2.37511900  | -1.33757200 | 2.29286600  |
| H | 3.36981800  | -0.50961900 | 1.05848700  |

**b1...(<sup>3</sup>iPrOH)**

|   |             |             |             |
|---|-------------|-------------|-------------|
| C | -0.41097600 | -0.20216100 | 2.38163700  |
| H | 0.27430000  | 0.53144300  | 2.86495300  |
| O | -0.15160600 | -0.25755100 | 1.00802400  |
| C | -1.84169800 | 0.27030800  | 2.63903200  |
| H | -2.55345800 | -0.42974900 | 2.17103000  |
| H | -2.06812600 | 0.33082000  | 3.71505100  |
| H | -1.99551500 | 1.26577600  | 2.19581300  |
| C | -0.15489500 | -1.56301400 | 3.02762400  |
| H | 0.87323800  | -1.89652300 | 2.81912500  |
| H | -0.29629800 | -1.53539400 | 4.11946900  |
| H | -0.84666800 | -2.31251500 | 2.60771700  |
| C | 0.46837600  | 2.64619400  | -0.52934500 |
| H | 0.69184900  | 2.11023900  | -1.47718700 |
| O | -0.67092500 | 2.08920700  | 0.08066700  |
| H | -0.44696600 | 1.15655300  | 0.40971800  |
| C | 0.15642400  | 4.09279100  | -0.87549800 |
| H | -0.04619000 | 4.66361700  | 0.04491300  |
| H | 0.99466800  | 4.56928900  | -1.40458400 |

|   |             |             |             |
|---|-------------|-------------|-------------|
| H | -0.73705100 | 4.14877400  | -1.51524800 |
| C | 1.69155200  | 2.52642200  | 0.37305500  |
| H | 1.90742400  | 1.47027500  | 0.59399600  |
| H | 2.58228000  | 2.96773600  | -0.10062400 |
| H | 1.50821200  | 3.05120000  | 1.32510900  |
| C | 2.36483400  | -1.18937800 | -0.76522300 |
| H | 1.96352200  | -0.32079200 | -1.33197300 |
| O | 2.27586900  | -0.93721100 | 0.61707700  |
| H | 1.30639800  | -0.68292600 | 0.79985400  |
| C | 3.83142200  | -1.35090700 | -1.12837500 |
| H | 4.26374800  | -2.19351800 | -0.56529100 |
| H | 3.95996500  | -1.54832000 | -2.20276400 |
| H | 4.39695300  | -0.44260700 | -0.87140600 |
| C | 1.54707800  | -2.41951000 | -1.14651500 |
| H | 0.49091200  | -2.28598800 | -0.86670700 |
| H | 1.59464800  | -2.61771000 | -2.22872300 |
| H | 1.93487400  | -3.30305700 | -0.61358300 |
| C | -2.36588300 | -0.63779200 | -1.20294200 |
| H | -2.64133500 | 0.29002900  | -0.66077800 |
| C | -3.60556700 | -1.17571400 | -1.89631000 |
| H | -4.01277500 | -0.44641100 | -2.61198600 |
| H | -3.36000900 | -2.09998000 | -2.44362200 |
| H | -4.38634700 | -1.41325300 | -1.15860500 |
| C | -1.26854800 | -0.27235000 | -2.19731300 |
| H | -1.58318500 | 0.54852100  | -2.86091400 |
| H | -0.36640600 | 0.05135400  | -1.65623600 |
| H | -1.00776800 | -1.14382600 | -2.82016200 |
| O | -1.91259000 | -1.60544900 | -0.28305400 |
| H | -1.19358600 | -1.14436100 | 0.26297400  |

## **c1**

|   |             |             |             |
|---|-------------|-------------|-------------|
| C | -0.98276800 | -0.08862600 | 0.02587200  |
| C | -0.64250300 | 1.23929800  | 0.03005000  |
| C | 0.78005800  | 1.27520500  | 0.01650900  |
| C | 1.19565800  | -0.03088900 | 0.00523700  |
| O | 0.11366500  | -0.85838400 | 0.01074300  |
| H | -1.33601000 | 2.07519300  | 0.04020700  |
| H | 1.43002200  | 2.14745200  | 0.01429400  |
| C | 2.51565600  | -0.64065000 | -0.01729100 |
| H | 2.51485300  | -1.75303200 | -0.02615800 |
| O | 3.54526600  | -0.00027300 | -0.02651000 |
| C | -2.30396800 | -0.77766700 | 0.04219100  |
| H | -2.32498700 | -1.51740700 | -0.77921100 |
| H | -2.39744100 | -1.34313000 | 0.98764900  |

|   |             |             |             |
|---|-------------|-------------|-------------|
| O | -3.29665700 | 0.20318700  | -0.09053000 |
| H | -4.15742600 | -0.22535100 | -0.00182000 |

### **c1...(*i*PrOH)**

|   |             |             |             |
|---|-------------|-------------|-------------|
| C | 0.53628300  | 1.21464800  | -0.02519400 |
| C | 0.65311200  | 1.10288800  | 1.33505000  |
| C | 1.74375900  | 0.21552900  | 1.55500800  |
| C | 2.20775600  | -0.13804700 | 0.31413000  |
| O | 1.46577800  | 0.47478100  | -0.64659300 |
| H | 0.02249100  | 1.58557900  | 2.07601800  |
| H | 2.14494700  | -0.12735900 | 2.50642100  |
| C | 3.29374700  | -1.01295700 | -0.09427000 |
| H | 3.84027200  | -1.47809500 | 0.75425100  |
| O | 3.59441500  | -1.23123500 | -1.24832400 |
| C | -0.42310300 | 1.96619200  | -0.88322700 |
| H | 0.04907900  | 2.89874400  | -1.23900200 |
| H | -0.65949400 | 1.35337400  | -1.77091700 |
| O | -1.56307000 | 2.24003400  | -0.10239300 |
| H | -2.16381100 | 2.80328500  | -0.60997800 |
| H | -2.15865700 | 0.67814800  | 0.76444400  |
| O | -2.28723400 | -0.23959700 | 1.06027100  |
| C | -1.98645100 | -1.07674500 | -0.04150800 |
| H | -0.93770600 | -0.90950900 | -0.36272800 |
| C | -2.11193500 | -2.51283300 | 0.43048800  |
| C | -2.90497700 | -0.77023800 | -1.21610000 |
| H | -3.14155400 | -2.70969500 | 0.76799600  |
| H | -1.86744600 | -3.21634000 | -0.37785200 |
| H | -1.43038100 | -2.69924600 | 1.27344200  |
| H | -2.82426700 | 0.29151300  | -1.49682100 |
| H | -2.64981500 | -1.38027500 | -2.09514800 |
| H | -3.95191200 | -0.97261500 | -0.94007100 |

### **c1...(2 *i*PrOH)**

|   |             |             |             |
|---|-------------|-------------|-------------|
| C | -1.79745400 | -0.44837100 | 0.40714600  |
| C | -2.29294300 | 0.18027300  | 1.51931100  |
| C | -3.70503700 | 0.22368800  | 1.33894600  |
| C | -3.95658600 | -0.37949900 | 0.13470100  |
| O | -2.78815900 | -0.79002400 | -0.42841300 |
| H | -1.71376200 | 0.56510800  | 2.35446800  |
| H | -4.45097900 | 0.64753100  | 2.00793800  |
| C | -5.19954900 | -0.62009300 | -0.57995100 |
| H | -6.10357800 | -0.25497300 | -0.04661200 |
| O | -5.26735800 | -1.16599400 | -1.66003600 |
| C | -0.40514400 | -0.78722700 | -0.01343700 |

|   |             |             |             |
|---|-------------|-------------|-------------|
| H | -0.34364800 | -1.85635500 | -0.27601600 |
| H | -0.14239200 | -0.21255600 | -0.91550900 |
| O | 0.52259700  | -0.44059700 | 0.99069600  |
| H | 0.36019300  | 1.47496300  | 0.93155000  |
| O | 0.29218500  | 2.27132700  | 0.38216800  |
| C | 1.47234000  | 2.32756800  | -0.40453900 |
| H | 1.53682100  | 1.42328600  | -1.04119000 |
| C | 1.35795300  | 3.54383600  | -1.30304500 |
| C | 2.71061800  | 2.37581300  | 0.47858800  |
| H | 1.28815900  | 4.45877200  | -0.69388800 |
| H | 2.23337100  | 3.62853000  | -1.96225600 |
| H | 0.45547300  | 3.47663500  | -1.92782400 |
| H | 2.74852900  | 1.49804600  | 1.14247800  |
| H | 3.62962500  | 2.37919900  | -0.12605100 |
| H | 2.69556300  | 3.28233600  | 1.10416800  |
| H | 0.40712100  | -1.02280400 | 1.75779400  |
| H | 2.14247900  | -0.51168500 | 0.04797800  |
| O | 2.82714500  | -0.71860800 | -0.60989500 |
| C | 3.45068100  | -1.92752300 | -0.20985400 |
| H | 2.71240400  | -2.75324300 | -0.23969600 |
| C | 4.54801700  | -2.22445300 | -1.21367600 |
| C | 3.98577900  | -1.80856600 | 1.20942600  |
| H | 5.30089100  | -1.42101100 | -1.19595800 |
| H | 5.04642700  | -3.17648000 | -0.98293900 |
| H | 4.13306600  | -2.28620900 | -2.23022500 |
| H | 3.16981600  | -1.57485800 | 1.91130000  |
| H | 4.45935800  | -2.74555300 | 1.53781300  |
| H | 4.73173000  | -1.00018900 | 1.26482300  |

## d1

|   |             |             |             |
|---|-------------|-------------|-------------|
| C | -0.96176600 | -0.07139600 | 0.00002400  |
| C | -0.83965500 | 1.29773400  | -0.00005800 |
| C | 0.55249000  | 1.57343400  | 0.00006100  |
| C | 1.18630300  | 0.35357100  | -0.00003800 |
| O | 0.25666000  | -0.64427400 | 0.00003000  |
| H | -1.67408900 | 1.99189900  | -0.00011200 |
| H | 1.04763900  | 2.54285000  | 0.00008700  |
| C | 2.59146300  | 0.01602100  | -0.00010400 |
| H | 3.26275700  | 0.90338500  | 0.00001000  |
| O | 3.03486200  | -1.11639600 | 0.00009500  |
| C | -2.21848300 | -0.91795200 | 0.00000400  |
| H | -2.05968500 | -1.62403600 | -0.87703400 |
| H | -2.05974500 | -1.62401300 | 0.87706900  |
| O | -3.33889600 | -0.20165000 | -0.00004400 |

**d1...(<sup>i</sup>PrOH)**

|   |             |             |             |
|---|-------------|-------------|-------------|
| C | 1.10149500  | -0.47806700 | 0.26844500  |
| C | 1.51678500  | -1.51172300 | -0.53519200 |
| C | 2.87193700  | -1.23677700 | -0.86194400 |
| C | 3.18731200  | -0.05663500 | -0.23386900 |
| O | 2.10299300  | 0.39944000  | 0.45386400  |
| H | 0.90119700  | -2.35297200 | -0.83836900 |
| H | 3.54672400  | -1.82485100 | -1.48125900 |
| C | 4.41600800  | 0.70745600  | -0.19828500 |
| H | 5.24257600  | 0.25355300  | -0.78797400 |
| O | 4.56401700  | 1.74943900  | 0.40885200  |
| C | -0.22796700 | -0.22877200 | 0.92759800  |
| H | -0.00958900 | -0.13420800 | 2.02122000  |
| H | -0.52338800 | 0.80872500  | 0.62292000  |
| O | -1.14671900 | -1.18191600 | 0.62016400  |
| H | -2.01738900 | -0.53947200 | -0.28457900 |
| O | -2.66929000 | 0.05168400  | -0.87209300 |
| C | -3.64252300 | 0.54450500  | 0.00488400  |
| H | -3.16477500 | 1.11041300  | 0.83650600  |
| C | -4.54225900 | 1.50908100  | -0.75357200 |
| C | -4.44304300 | -0.59276700 | 0.63611500  |
| H | -5.04653100 | 0.97914500  | -1.57794900 |
| H | -5.31050100 | 1.95028800  | -0.10091700 |
| H | -3.94563300 | 2.32415800  | -1.19023900 |
| H | -3.75373500 | -1.27086500 | 1.16011000  |
| H | -5.18950600 | -0.22408300 | 1.35676900  |
| H | -4.96392900 | -1.16681100 | -0.14762200 |

**d1...(2 <sup>i</sup>PrOH)**

|   |             |             |             |
|---|-------------|-------------|-------------|
| C | 1.39496500  | -0.74192500 | 0.52001000  |
| C | 1.90899100  | -0.13728600 | 1.64094200  |
| C | 3.31428300  | -0.06812200 | 1.43909700  |
| C | 3.55505400  | -0.63394000 | 0.21157400  |
| O | 2.37995400  | -1.04263100 | -0.34266200 |
| H | 1.32912300  | 0.20883900  | 2.49126600  |
| H | 4.06882400  | 0.34605500  | 2.10507400  |
| C | 4.78667200  | -0.83210000 | -0.52531400 |
| H | 5.69084500  | -0.46190700 | 0.00578100  |
| O | 4.85718400  | -1.35097800 | -1.62096600 |
| C | -0.01923700 | -1.06495000 | 0.14171900  |
| H | -0.12707200 | -0.78089800 | -0.93266500 |
| H | -0.12058800 | -2.17468700 | 0.14774600  |
| O | -0.91680500 | -0.44159100 | 0.97208700  |

|   |             |             |             |
|---|-------------|-------------|-------------|
| H | -2.15161700 | -1.31180300 | 0.89786200  |
| O | -2.95789600 | -1.88979200 | 0.65790400  |
| C | -3.65357000 | -1.17194900 | -0.33116400 |
| H | -2.93544600 | -0.74709100 | -1.06398300 |
| C | -4.57393700 | -2.13241000 | -1.06715300 |
| C | -4.42529500 | -0.00591100 | 0.28033300  |
| H | -5.30468700 | -2.56431000 | -0.36439200 |
| H | -5.12501700 | -1.62780500 | -1.87442600 |
| H | -3.99291800 | -2.95828000 | -1.50370800 |
| H | -3.73217400 | 0.68869600  | 0.77784600  |
| H | -4.97927100 | 0.56014500  | -0.48469400 |
| H | -5.14281200 | -0.38059900 | 1.02820300  |
| H | -1.28754900 | 0.78411300  | 0.21273100  |
| O | -1.46808700 | 1.62926300  | -0.34336400 |
| C | -0.44591200 | 2.54760100  | -0.04378100 |
| H | -0.05624500 | 2.34779800  | 0.97568500  |
| C | 0.71659700  | 2.41383000  | -1.02455700 |
| C | -1.02286400 | 3.95605200  | -0.06402200 |
| H | 0.36369900  | 2.60990700  | -2.05014300 |
| H | 1.52714400  | 3.12248600  | -0.79380900 |
| H | 1.13753300  | 1.39658500  | -1.00052400 |
| H | -1.84380500 | 4.04424300  | 0.66278500  |
| H | -0.25995500 | 4.71100600  | 0.17758600  |
| H | -1.42729300 | 4.18000400  | -1.06430200 |

### **d1... (3 <sup>i</sup>PrOH)**

|   |             |             |             |
|---|-------------|-------------|-------------|
| C | -1.76095500 | 0.38987100  | -0.76826800 |
| C | -1.93044900 | 1.13663900  | 0.37327600  |
| C | -3.32903600 | 1.14954700  | 0.62780700  |
| C | -3.91085200 | 0.41496900  | -0.37518900 |
| O | -2.95006900 | -0.04310100 | -1.22251700 |
| H | -1.13093800 | 1.59273900  | 0.95240400  |
| H | -3.85565600 | 1.63487500  | 1.44720400  |
| C | -5.29592200 | 0.07718800  | -0.63785900 |
| H | -6.00887900 | 0.49094500  | 0.10839200  |
| O | -5.67235000 | -0.59392400 | -1.57695300 |
| C | -0.53737600 | -0.01162400 | -1.54067600 |
| H | -0.74805700 | -1.02149400 | -1.95539900 |
| H | -0.47536300 | 0.65811100  | -2.42683700 |
| O | 0.60878700  | 0.02319000  | -0.77513700 |
| H | 1.99355000  | -0.20673400 | -1.54598200 |
| O | 2.89556600  | -0.43796700 | -1.91774400 |
| C | 3.44362000  | -1.40673300 | -1.04902500 |
| H | 2.73129100  | -2.24755200 | -0.93077900 |

|   |             |             |             |
|---|-------------|-------------|-------------|
| C | 4.71394400  | -1.94344000 | -1.68534200 |
| C | 3.70737400  | -0.82548600 | 0.33619000  |
| H | 5.44117800  | -1.12673400 | -1.81944000 |
| H | 5.17590600  | -2.72156400 | -1.06028900 |
| H | 4.49655600  | -2.37338000 | -2.67438500 |
| H | 2.79990100  | -0.35011100 | 0.73903900  |
| H | 4.02705700  | -1.60842300 | 1.04139700  |
| H | 4.49976300  | -0.06077700 | 0.28472600  |
| H | 0.62216900  | -1.31602700 | 0.03135000  |
| O | 0.57622100  | -2.14832400 | 0.59852100  |
| C | -0.23070100 | -1.84508300 | 1.71428200  |
| H | -0.23710200 | -0.74783400 | 1.87218400  |
| C | -1.66600100 | -2.30652100 | 1.47861100  |
| C | 0.36793100  | -2.49877700 | 2.95108500  |
| H | -1.69180400 | -3.40264800 | 1.36583000  |
| H | -2.32765600 | -2.02761100 | 2.31348200  |
| H | -2.07095000 | -1.86430800 | 0.55488000  |
| H | 1.39042700  | -2.13020800 | 3.12134900  |
| H | -0.23290000 | -2.29071100 | 3.84891000  |
| H | 0.41647500  | -3.59080000 | 2.81203700  |
| H | 0.90442100  | 1.02167400  | 0.41514100  |
| O | 1.14827200  | 1.69312800  | 1.12172200  |
| C | 1.50459400  | 2.87359700  | 0.43259000  |
| H | 0.74988000  | 3.07982300  | -0.35464300 |
| C | 1.49184800  | 4.02573300  | 1.42255500  |
| C | 2.86195400  | 2.71916500  | -0.24298100 |
| H | 2.20174800  | 3.82214200  | 2.24008700  |
| H | 1.78030500  | 4.97060400  | 0.93952600  |
| H | 0.49142400  | 4.15212200  | 1.86288000  |
| H | 2.86156700  | 1.84452400  | -0.91084800 |
| H | 3.11828600  | 3.61134500  | -0.83483700 |
| H | 3.64615800  | 2.56973800  | 0.51712900  |

## e1

|   |             |             |             |
|---|-------------|-------------|-------------|
| C | 0.81136700  | -1.03342400 | 0.00016600  |
| C | -0.55994200 | -1.28859500 | 0.00002600  |
| C | -1.47158300 | -0.23092000 | -0.00005100 |
| C | -1.00546200 | 1.09291000  | -0.00007800 |
| C | 0.35749300  | 1.34429500  | -0.00006700 |
| C | 1.27837800  | 0.28254100  | 0.00008500  |
| H | 1.52771000  | -1.85433400 | 0.00028100  |
| H | -0.92794500 | -2.31791600 | 0.00002400  |
| H | -1.72893000 | 1.91056800  | -0.00018700 |
| H | 0.72475700  | 2.37368300  | -0.00010800 |

|   |             |             |             |
|---|-------------|-------------|-------------|
| C | -2.92233300 | -0.51307500 | -0.00002600 |
| H | -3.19392300 | -1.59349600 | 0.00000600  |
| C | 2.75264300  | 0.59109300  | 0.00023500  |
| H | 2.97737400  | 1.21346200  | -0.88566800 |
| H | 2.97748900  | 1.21238000  | 0.88685300  |
| O | 3.50085400  | -0.59675600 | -0.00039900 |
| H | 4.43699800  | -0.36053700 | 0.00016600  |
| O | -3.78046600 | 0.34016000  | 0.00001000  |

### e1...(<sup>i</sup>PrOH)

|   |             |             |             |
|---|-------------|-------------|-------------|
| C | 0.81364000  | 0.09355800  | -0.73287900 |
| C | 1.92576600  | -0.73343600 | -0.61143900 |
| C | 3.03341300  | -0.31574800 | 0.13406400  |
| C | 3.01855500  | 0.93543700  | 0.76250900  |
| C | 1.90594500  | 1.75950800  | 0.64311300  |
| C | 0.79586900  | 1.34622800  | -0.10569100 |
| H | -0.05486500 | -0.23680900 | -1.30263900 |
| H | 1.94747600  | -1.71272300 | -1.09370000 |
| H | 3.88476900  | 1.25656400  | 1.34643800  |
| H | 1.89193000  | 2.73502400  | 1.13485800  |
| C | 4.22067800  | -1.18739000 | 0.26670600  |
| H | 5.04675400  | -0.76941900 | 0.88628700  |
| C | -0.38205000 | 2.27636000  | -0.23668100 |
| H | -0.67521000 | 2.63206000  | 0.76620300  |
| H | -0.06897700 | 3.16237100  | -0.81633300 |
| O | -1.45218500 | 1.61795400  | -0.87735800 |
| H | -2.17255800 | 2.24879800  | -1.01185700 |
| O | 4.32350900  | -2.27868600 | -0.24540100 |
| H | -1.94499200 | 0.08182500  | 0.00081200  |
| O | -2.29922100 | -0.77566900 | 0.29681400  |
| C | -3.65430600 | -0.81687100 | -0.11274400 |
| H | -3.71573500 | -0.67070700 | -1.20921100 |
| C | -4.19037700 | -2.19627200 | 0.21959800  |
| C | -4.45313500 | 0.28763900  | 0.56594900  |
| H | -4.13814900 | -2.36839300 | 1.30623000  |
| H | -5.23657200 | -2.30196500 | -0.10049000 |
| H | -3.59204800 | -2.97197200 | -0.28017400 |
| H | -4.02238600 | 1.27329200  | 0.33083100  |
| H | -5.50267700 | 0.28497300  | 0.23640200  |
| H | -4.42756800 | 0.15420500  | 1.65886800  |

### e1...(2 <sup>i</sup>PrOH)

|   |            |             |            |
|---|------------|-------------|------------|
| C | 0.49059300 | -0.95859200 | 0.87042200 |
| C | 1.47829800 | -1.52579700 | 0.07621400 |

|   |             |             |             |
|---|-------------|-------------|-------------|
| C | 2.77800100  | -1.00065300 | 0.09628800  |
| C | 3.07957900  | 0.09207200  | 0.91308400  |
| C | 2.08357400  | 0.66744400  | 1.70007000  |
| C | 0.78639700  | 0.14740800  | 1.68354700  |
| H | -0.52161900 | -1.36951600 | 0.86699800  |
| H | 1.25980600  | -2.38233500 | -0.56470700 |
| H | 4.09486600  | 0.49655900  | 0.92149100  |
| H | 2.31133000  | 1.53390100  | 2.32477900  |
| C | 3.84019600  | -1.59488600 | -0.74568500 |
| H | 4.83921400  | -1.11079700 | -0.65506000 |
| C | -0.29640000 | 0.77173300  | 2.52304000  |
| H | -0.50798100 | 0.13343500  | 3.39840200  |
| H | 0.03727000  | 1.75291700  | 2.89291100  |
| O | -1.47073000 | 0.90941400  | 1.73111000  |
| H | -2.11297200 | 1.45652500  | 2.20810800  |
| O | 3.67207100  | -2.53568600 | -1.48649100 |
| H | -2.45950700 | -0.63910200 | 1.35160200  |
| O | -2.88561800 | -1.42084400 | 0.95902800  |
| C | -3.04680300 | -1.15290800 | -0.42712400 |
| H | -2.05847800 | -0.93851200 | -0.87509300 |
| C | -3.61694500 | -2.40467800 | -1.06552800 |
| C | -3.93605800 | 0.06289000  | -0.64363500 |
| H | -4.59512000 | -2.64397200 | -0.61941600 |
| H | -3.75088500 | -2.26720000 | -2.14775000 |
| H | -2.94628400 | -3.26129900 | -0.90416200 |
| H | -3.50851300 | 0.94951300  | -0.15063600 |
| H | -4.03762900 | 0.29121700  | -1.71503200 |
| H | -4.93894300 | -0.11781500 | -0.22518000 |
| H | -1.13503200 | 1.20013000  | -0.12153100 |
| O | -0.98352300 | 1.33943200  | -1.07274100 |
| C | 0.30421300  | 1.90563800  | -1.24809500 |
| H | 1.07705100  | 1.16957800  | -0.95166300 |
| C | 0.46796900  | 2.20341900  | -2.72640100 |
| C | 0.46611200  | 3.14949500  | -0.38653300 |
| H | -0.29059500 | 2.93232200  | -3.05213700 |
| H | 1.46465000  | 2.61747500  | -2.93505700 |
| H | 0.34146800  | 1.28568200  | -3.31886600 |
| H | 0.28489900  | 2.91111300  | 0.67365500  |
| H | 1.48115100  | 3.56502900  | -0.47419600 |
| H | -0.25809300 | 3.92112300  | -0.69269000 |

## **f1**

|   |             |             |            |
|---|-------------|-------------|------------|
| C | -0.85669800 | -1.03399700 | 0.00020800 |
| C | 0.51325900  | -1.28899300 | 0.00025100 |

|   |             |             |             |
|---|-------------|-------------|-------------|
| C | 1.42296800  | -0.22605300 | 0.00004300  |
| C | 0.94729400  | 1.09792700  | -0.00000900 |
| C | -0.41719600 | 1.34120800  | -0.00002600 |
| C | -1.33731200 | 0.27665400  | 0.00001500  |
| H | -1.60332600 | -1.82959200 | 0.00012000  |
| H | 0.88955200  | -2.31627100 | 0.00011500  |
| H | 1.66883000  | 1.91803400  | -0.00004600 |
| H | -0.78966800 | 2.37065800  | 0.00020600  |
| C | 2.86826800  | -0.50470600 | -0.00010100 |
| H | 3.13795700  | -1.58646800 | -0.00057500 |
| C | -2.85687100 | 0.50300300  | 0.00010400  |
| H | -3.00555700 | 1.21289500  | 0.87755400  |
| H | -3.00512100 | 1.21351200  | -0.87669100 |
| O | -3.60922100 | -0.59004700 | -0.00037600 |
| O | 3.73485400  | 0.34341900  | -0.00007300 |

### f1...(<sup>t</sup>PrOH)

|   |             |             |             |
|---|-------------|-------------|-------------|
| C | -0.98168300 | 0.21884500  | -1.01526900 |
| C | -2.22090600 | -0.40525900 | -0.92392800 |
| C | -3.04257400 | -0.16922200 | 0.18619600  |
| C | -2.60960700 | 0.69775800  | 1.19977100  |
| C | -1.37027900 | 1.31860500  | 1.10120900  |
| C | -0.54116700 | 1.08521400  | -0.00630900 |
| H | -0.31781500 | 0.05328600  | -1.86493500 |
| H | -2.57133500 | -1.08270800 | -1.70611900 |
| H | -3.25409800 | 0.87724100  | 2.06477500  |
| H | -1.03171400 | 1.99388000  | 1.89233300  |
| C | -4.35701300 | -0.82650000 | 0.30048700  |
| H | -4.93022400 | -0.57717600 | 1.22350500  |
| C | 0.81213700  | 1.77397000  | -0.13574600 |
| H | 0.57406200  | 2.87075200  | -0.14937400 |
| H | 1.31513400  | 1.63281900  | 0.85649100  |
| O | 1.57271500  | 1.36566300  | -1.18329400 |
| O | -4.81810900 | -1.58706400 | -0.52238800 |
| H | 2.76220900  | 0.93583400  | -0.57943200 |
| O | 3.61183600  | 0.57901100  | -0.05043700 |
| C | 3.58996600  | -0.81673600 | -0.13957600 |
| H | 3.54124000  | -1.13812100 | -1.20443000 |
| C | 4.88285400  | -1.36398700 | 0.44741700  |
| C | 2.36719300  | -1.40121800 | 0.56505300  |
| H | 4.96204200  | -1.07282600 | 1.50742000  |
| H | 4.92998400  | -2.46149600 | 0.38331400  |
| H | 5.75070400  | -0.94537200 | -0.08413200 |
| H | 1.45225700  | -0.97960800 | 0.12251700  |

|   |            |             |            |
|---|------------|-------------|------------|
| H | 2.32491500 | -2.49795900 | 0.47542900 |
| H | 2.38757300 | -1.13824400 | 1.63576200 |

**f1...( $2^i$ PrOH)**

|   |             |             |             |
|---|-------------|-------------|-------------|
| C | 0.74925300  | -0.72142200 | -0.45560200 |
| C | 1.92367800  | -1.39403800 | -0.77342300 |
| C | 2.88153800  | -1.64239000 | 0.21851200  |
| C | 2.65049100  | -1.21032300 | 1.53104700  |
| C | 1.47416700  | -0.53837700 | 1.84320100  |
| C | 0.50982600  | -0.28827100 | 0.85617600  |
| H | -0.00071900 | -0.51563500 | -1.22028100 |
| H | 2.11701800  | -1.73490800 | -1.79284600 |
| H | 3.40221200  | -1.40237700 | 2.30145500  |
| H | 1.29487100  | -0.19708600 | 2.86655000  |
| C | 4.13220100  | -2.35391300 | -0.10444600 |
| H | 4.82483500  | -2.50117900 | 0.75637100  |
| C | -0.78620000 | 0.42853000  | 1.21116400  |
| H | -1.36190600 | -0.28835700 | 1.84569300  |
| H | -0.50998300 | 1.25222100  | 1.91054000  |
| O | -1.51947700 | 0.86642500  | 0.13840200  |
| O | 4.42393600  | -2.76536300 | -1.20577800 |
| H | -2.19253800 | -0.38272500 | -0.36912800 |
| O | -2.63057400 | -1.27447800 | -0.62173400 |
| C | -4.02114200 | -1.11724800 | -0.49680700 |
| H | -4.38808800 | -0.35176100 | -1.21432100 |
| C | -4.68561300 | -2.43865000 | -0.84682700 |
| C | -4.39468900 | -0.65031100 | 0.90674600  |
| H | -4.35638100 | -3.22002000 | -0.14329700 |
| H | -5.78223500 | -2.36529900 | -0.80040300 |
| H | -4.40038100 | -2.75319000 | -1.86194300 |
| H | -3.87423000 | 0.29188500  | 1.13372100  |
| H | -5.47827000 | -0.48406100 | 1.00641600  |
| H | -4.08765700 | -1.40550900 | 1.64858000  |
| H | -0.59711300 | 1.72924100  | -0.73688400 |
| O | 0.07807300  | 2.30774500  | -1.23565700 |
| C | 0.74396300  | 3.07524500  | -0.26507600 |
| H | 1.24401700  | 2.40932300  | 0.47234000  |
| C | 1.82167700  | 3.89361100  | -0.95666700 |
| C | -0.24053200 | 3.95886200  | 0.49524000  |
| H | 1.36260400  | 4.56383100  | -1.70115800 |
| H | 2.38756600  | 4.50524600  | -0.23855900 |
| H | 2.52618700  | 3.23218400  | -1.48257900 |
| H | -1.04251300 | 3.33788300  | 0.92239500  |
| H | 0.24952600  | 4.51416300  | 1.30960900  |

|   |             |            |             |
|---|-------------|------------|-------------|
| H | -0.70420000 | 4.68367900 | -0.19355400 |
|---|-------------|------------|-------------|

**f1... (3 <sup>i</sup>PrOH)**

|   |             |             |             |
|---|-------------|-------------|-------------|
| C | -2.13022800 | -0.01271300 | -0.47738700 |
| C | -3.51290100 | -0.07521600 | -0.61383400 |
| C | -4.32829700 | -0.15094900 | 0.52199000  |
| C | -3.74488000 | -0.16379200 | 1.79604700  |
| C | -2.36306300 | -0.10108000 | 1.92677800  |
| C | -1.54039100 | -0.02414400 | 0.79358600  |
| H | -1.48865100 | 0.04734700  | -1.35759100 |
| H | -3.97982200 | -0.06628000 | -1.60100000 |
| H | -4.38430400 | -0.22371900 | 2.68078600  |
| H | -1.90690500 | -0.11106100 | 2.92036300  |
| C | -5.79649800 | -0.21804800 | 0.39102300  |
| H | -6.35265100 | -0.27689900 | 1.35515700  |
| C | -0.03156900 | 0.05401100  | 0.96078700  |
| H | 0.16489300  | 0.95933800  | 1.57904800  |
| H | 0.26026600  | -0.80142700 | 1.61078700  |
| O | 0.66870000  | 0.07387900  | -0.22634100 |
| O | -6.39228000 | -0.21310800 | -0.66338500 |
| H | 0.29755400  | 1.45890000  | -0.89427600 |
| O | 0.05620300  | 2.37097000  | -1.24228300 |
| C | 1.18454200  | 3.20012000  | -1.08634300 |
| H | 2.06409100  | 2.74508500  | -1.58792300 |
| C | 0.88714400  | 4.52883100  | -1.76045900 |
| C | 1.53482300  | 3.37527100  | 0.38715400  |
| H | 0.02310700  | 5.01036300  | -1.27495000 |
| H | 1.74618200  | 5.21272900  | -1.70051200 |
| H | 0.63901900  | 4.37193200  | -2.82064800 |
| H | 1.78438400  | 2.40097600  | 0.83255900  |
| H | 2.40275700  | 4.03973100  | 0.51959200  |
| H | 0.67689100  | 3.80477700  | 0.92929200  |
| H | 0.35989600  | -1.34141900 | -0.86409100 |
| O | 0.14215400  | -2.28902200 | -1.12109800 |
| C | 1.23622600  | -3.08538600 | -0.73194800 |
| H | 1.43763600  | -2.94907600 | 0.35215200  |
| C | 0.86585600  | -4.54096200 | -0.96170300 |
| C | 2.49812100  | -2.69597800 | -1.49602100 |
| H | 0.66251100  | -4.70965300 | -2.03141500 |
| H | 1.67612200  | -5.21636100 | -0.65060900 |
| H | -0.04201800 | -4.80124700 | -0.39766100 |
| H | 2.73879900  | -1.63569700 | -1.32417300 |
| H | 3.36240400  | -3.30262200 | -1.18300100 |
| H | 2.34081700  | -2.84448700 | -2.57661900 |

|   |            |             |             |
|---|------------|-------------|-------------|
| H | 2.21484800 | 0.31533900  | -0.11900100 |
| O | 3.21820400 | 0.41565000  | -0.07519400 |
| C | 3.66925600 | -0.34861500 | 1.01944500  |
| H | 3.11573300 | -1.31048100 | 1.05322700  |
| C | 5.14362000 | -0.65531400 | 0.81266100  |
| C | 3.42676100 | 0.38252400  | 2.33589700  |
| H | 5.71135100 | 0.28536300  | 0.73187300  |
| H | 5.55477000 | -1.23898000 | 1.64922000  |
| H | 5.29346000 | -1.22439600 | -0.11698500 |
| H | 2.35637100 | 0.60455900  | 2.46541600  |
| H | 3.75730100 | -0.21749700 | 3.19758200  |
| H | 3.97819800 | 1.33654000  | 2.34376700  |

### g1

|   |             |             |             |
|---|-------------|-------------|-------------|
| C | -1.21529500 | 1.18506500  | -0.00006000 |
| C | 0.16557900  | 1.33744600  | -0.00004500 |
| C | 1.00476300  | 0.21725200  | -0.00002700 |
| C | 0.44098800  | -1.06904200 | -0.00007300 |
| C | -0.93336100 | -1.23302500 | -0.00006900 |
| C | -1.76944300 | -0.10249300 | 0.00001600  |
| H | -1.87731600 | 2.05385800  | -0.00010200 |
| H | 0.60223400  | 2.33952500  | -0.00005800 |
| H | 1.10320400  | -1.93727100 | -0.00011500 |
| H | -1.39042300 | -2.22368000 | -0.00008500 |
| C | 2.46581000  | 0.39534000  | 0.00004600  |
| H | 2.81027200  | 1.45511200  | -0.00006600 |
| O | 3.26709900  | -0.51370400 | 0.00009100  |
| O | -3.09599500 | -0.31176900 | 0.00005500  |
| H | -3.57105400 | 0.53297700  | 0.00053600  |

### g1...(<sup>i</sup>PrOH)

|   |             |             |             |
|---|-------------|-------------|-------------|
| C | -0.35101800 | -0.29975100 | -0.73857900 |
| C | -1.54071700 | -0.99750000 | -0.58176200 |
| C | -2.66630600 | -0.37299500 | -0.02873000 |
| C | -2.58776100 | 0.96934400  | 0.36845200  |
| C | -1.40573700 | 1.67834200  | 0.21731200  |
| C | -0.28530700 | 1.04179500  | -0.33812200 |
| H | 0.53961200  | -0.76495300 | -1.16434400 |
| H | -1.60226900 | -2.04411800 | -0.89098000 |
| H | -3.46954900 | 1.44886800  | 0.79813500  |
| H | -1.33327500 | 2.72443700  | 0.52299200  |
| C | -3.92155100 | -1.12782100 | 0.13059200  |
| H | -3.88222000 | -2.18515700 | -0.21849200 |
| O | -4.94015600 | -0.67040400 | 0.60033700  |

|   |            |             |             |
|---|------------|-------------|-------------|
| O | 0.88838700 | 1.68515300  | -0.51132300 |
| H | 0.83954100 | 2.60080000  | -0.19579100 |
| H | 2.40012900 | 0.58074600  | -1.12271200 |
| O | 2.92625800 | -0.23091200 | -1.06002800 |
| C | 3.13463100 | -0.47664900 | 0.32264100  |
| H | 2.15387900 | -0.54712700 | 0.83375700  |
| C | 3.84036300 | -1.81383700 | 0.44046500  |
| C | 3.93158600 | 0.65526300  | 0.95383800  |
| H | 4.80866300 | -1.77481200 | -0.08260500 |
| H | 4.02252200 | -2.06999400 | 1.49365200  |
| H | 3.23579400 | -2.61270500 | -0.01306900 |
| H | 3.39506700 | 1.61033700  | 0.84575300  |
| H | 4.09644300 | 0.47591500  | 2.02642300  |
| H | 4.91065500 | 0.74992000  | 0.45875800  |

**g1... (2 <sup>i</sup>PrOH)**

|   |             |             |             |
|---|-------------|-------------|-------------|
| C | -0.47961500 | -0.79089400 | -0.40022800 |
| C | -1.64419600 | -1.08681200 | -1.09607300 |
| C | -2.87506700 | -1.15079600 | -0.43017700 |
| C | -2.93093000 | -0.91955100 | 0.95133300  |
| C | -1.77520400 | -0.62159300 | 1.65772000  |
| C | -0.55388400 | -0.55218400 | 0.97573700  |
| H | 0.49055800  | -0.74291400 | -0.89579000 |
| H | -1.60254400 | -1.27476400 | -2.17187900 |
| H | -3.89426800 | -0.97451300 | 1.46205600  |
| H | -1.80164800 | -0.43061700 | 2.73287900  |
| C | -4.10266100 | -1.46596400 | -1.18409200 |
| H | -3.95523800 | -1.63869700 | -2.27473000 |
| O | -5.20565700 | -1.54092400 | -0.68993000 |
| O | 0.60006900  | -0.22800400 | 1.61238800  |
| H | 0.46823000  | -0.16164400 | 2.57222000  |
| H | 2.11668800  | -1.17884000 | 0.79803300  |
| O | 2.67463500  | -1.79207600 | 0.29642300  |
| C | 3.93585600  | -1.18052200 | 0.07530000  |
| H | 4.33674200  | -0.80483100 | 1.03593600  |
| C | 4.86860300  | -2.25744800 | -0.44626600 |
| C | 3.81544000  | -0.01154200 | -0.89152600 |
| H | 4.48317100  | -2.66104300 | -1.39570800 |
| H | 5.87583200  | -1.85424800 | -0.62242400 |
| H | 4.94386900  | -3.08448800 | 0.27448300  |
| H | 3.10257000  | 0.74021700  | -0.52093800 |
| H | 4.78780100  | 0.48296500  | -1.03609000 |
| H | 3.45876900  | -0.36764700 | -1.87139700 |
| H | 1.05666700  | 1.47837300  | 0.66276100  |

|   |             |            |             |
|---|-------------|------------|-------------|
| O | 1.05138400  | 2.03801200 | -0.12826100 |
| C | 0.29875400  | 3.21049300 | 0.14162800  |
| H | 0.84424400  | 3.84010500 | 0.87067500  |
| C | 0.18234200  | 3.97315400 | -1.16369800 |
| C | -1.05939500 | 2.85852500 | 0.72849300  |
| H | -0.36341700 | 3.36853900 | -1.90468600 |
| H | -0.35550900 | 4.92052900 | -1.01851700 |
| H | 1.17996100  | 4.19753200 | -1.56833700 |
| H | -0.94266200 | 2.30029900 | 1.67093500  |
| H | -1.64213700 | 3.76645200 | 0.94348700  |
| H | -1.63139600 | 2.23397400 | 0.02315100  |

## h1

|   |             |             |             |
|---|-------------|-------------|-------------|
| C | 1.25867500  | 1.19914700  | 0.00013600  |
| C | -0.11022800 | 1.33864600  | 0.00019900  |
| C | -0.96899500 | 0.21448500  | 0.00001000  |
| C | -0.37705000 | -1.07353100 | 0.00038500  |
| C | 0.98674100  | -1.23278800 | 0.00019100  |
| C | 1.89882500  | -0.10180400 | -0.00043200 |
| H | 1.91320600  | 2.07480400  | 0.00034700  |
| H | -0.55592800 | 2.33939700  | 0.00031000  |
| H | -1.03696900 | -1.94603800 | 0.00058400  |
| H | 1.43654700  | -2.22944800 | 0.00032100  |
| C | -2.40213500 | 0.38429200  | -0.00010100 |
| H | -2.74033400 | 1.44977800  | 0.00006900  |
| O | -3.23525000 | -0.51305400 | -0.00028600 |
| O | 3.14381000  | -0.24434300 | -0.00020700 |

## h1...(<sup>i</sup>PrOH)

|   |             |             |             |
|---|-------------|-------------|-------------|
| C | -0.38683600 | -0.47687800 | -0.64084700 |
| C | -1.60628800 | -1.08880000 | -0.43806800 |
| C | -2.72885500 | -0.36200800 | 0.01003800  |
| C | -2.57716700 | 1.02261800  | 0.25093200  |
| C | -1.36793800 | 1.64972100  | 0.05522100  |
| C | -0.20609600 | 0.93109700  | -0.40373900 |
| H | 0.47808400  | -1.04358700 | -0.99286900 |
| H | -1.71388800 | -2.16165500 | -0.62892400 |
| H | -3.44611600 | 1.58840500  | 0.59802600  |
| H | -1.25088200 | 2.72014400  | 0.24145700  |
| C | -4.00127300 | -1.02728300 | 0.21248400  |
| H | -3.99304000 | -2.12153400 | -0.01202600 |
| O | -5.03244000 | -0.49563600 | 0.59377300  |
| O | 0.90750300  | 1.51882700  | -0.58804700 |
| H | 2.11869200  | 0.50243600  | -0.94215300 |

|   |            |             |             |
|---|------------|-------------|-------------|
| O | 2.84809500 | -0.17864000 | -0.99084000 |
| C | 3.23060600 | -0.42622400 | 0.34437500  |
| H | 2.33975100 | -0.71392700 | 0.94128800  |
| C | 4.20261700 | -1.59291000 | 0.34705800  |
| C | 3.83580000 | 0.82271600  | 0.97463900  |
| H | 5.09347100 | -1.34003800 | -0.24971300 |
| H | 4.52584800 | -1.84163900 | 1.36830800  |
| H | 3.73640100 | -2.48486200 | -0.09715900 |
| H | 3.10925600 | 1.64806400  | 0.93837000  |
| H | 4.11358500 | 0.65080900  | 2.02556400  |
| H | 4.73615100 | 1.12867600  | 0.41818300  |

### h1...( $2^i$ PrOH)

|   |             |             |             |
|---|-------------|-------------|-------------|
| C | -1.42170500 | -1.49459600 | 0.02169200  |
| C | -2.76807400 | -1.53965400 | 0.32701700  |
| C | -3.60547500 | -0.43048100 | 0.09940600  |
| C | -3.03974400 | 0.74040700  | -0.44853800 |
| C | -1.69814300 | 0.80207600  | -0.75930700 |
| C | -0.83204200 | -0.31953800 | -0.54115500 |
| H | -0.76841800 | -2.35075300 | 0.20374800  |
| H | -3.19906700 | -2.45028900 | 0.75500800  |
| H | -3.68895200 | 1.60229300  | -0.62409500 |
| H | -1.25834400 | 1.70868800  | -1.18228800 |
| C | -5.02141500 | -0.50285100 | 0.42493000  |
| H | -5.34949100 | -1.47933000 | 0.85549900  |
| O | -5.83329700 | 0.39222600  | 0.26435400  |
| O | 0.41738200  | -0.26981000 | -0.83706900 |
| H | 1.26273700  | -1.68197100 | -0.70512900 |
| O | 1.84917800  | -2.44182400 | -0.45578400 |
| C | 2.89643400  | -1.87446600 | 0.30213700  |
| H | 2.47428100  | -1.28485700 | 1.14176100  |
| C | 3.72276200  | -3.00825000 | 0.88282100  |
| C | 3.73748500  | -0.93988700 | -0.56084300 |
| H | 4.16164300  | -3.60804700 | 0.06969500  |
| H | 4.53889300  | -2.62602600 | 1.51278900  |
| H | 3.09162100  | -3.67004400 | 1.49423900  |
| H | 3.12095500  | -0.11884100 | -0.95840700 |
| H | 4.56786100  | -0.49928800 | 0.01222100  |
| H | 4.15888700  | -1.49854000 | -1.41202100 |
| H | 1.16350000  | 1.18446400  | -0.99378500 |
| O | 1.67187400  | 2.03710500  | -0.99467800 |
| C | 2.06406600  | 2.29985500  | 0.33619800  |
| H | 2.66106600  | 1.44917000  | 0.72409100  |
| C | 2.95150000  | 3.53195800  | 0.32066800  |

|   |            |            |             |
|---|------------|------------|-------------|
| C | 0.85698500 | 2.47974100 | 1.24884600  |
| H | 2.38801100 | 4.39572600 | -0.06661100 |
| H | 3.31407000 | 3.77553300 | 1.32969400  |
| H | 3.82133300 | 3.36956500 | -0.33292100 |
| H | 0.24189400 | 1.56696000 | 1.26173000  |
| H | 1.16943900 | 2.69342700 | 2.28228100  |
| H | 0.23119100 | 3.31469900 | 0.89469000  |

### **h1... (3 <sup>t</sup>PrOH)**

|   |             |             |             |
|---|-------------|-------------|-------------|
| C | -1.97534100 | -1.08132900 | -1.05975000 |
| C | -3.35318800 | -1.18561600 | -0.99001100 |
| C | -4.12739900 | -0.17564300 | -0.39229100 |
| C | -3.47438100 | 0.95684100  | 0.13359200  |
| C | -2.10042800 | 1.07361100  | 0.07146900  |
| C | -1.29888500 | 0.05224700  | -0.52364400 |
| H | -1.37707400 | -1.86307800 | -1.53362000 |
| H | -3.85520100 | -2.06418000 | -1.40665100 |
| H | -4.07795600 | 1.74462300  | 0.59142400  |
| H | -1.59225500 | 1.95494300  | 0.46953700  |
| C | -5.57905000 | -0.30539600 | -0.32909100 |
| H | -5.98351600 | -1.24195400 | -0.78172000 |
| O | -6.33733200 | 0.50892400  | 0.16458800  |
| O | -0.00796500 | 0.16168900  | -0.57848400 |
| H | 0.96385000  | -1.06452200 | -1.21947400 |
| O | 1.62619400  | -1.74233400 | -1.49459500 |
| C | 2.90672900  | -1.14806100 | -1.39975800 |
| H | 3.11456700  | -0.88464500 | -0.34336800 |
| C | 3.92595000  | -2.17986000 | -1.84844200 |
| C | 2.97980600  | 0.12644200  | -2.23159000 |
| H | 3.73682100  | -2.46294000 | -2.89615100 |
| H | 4.94994300  | -1.78676400 | -1.77174800 |
| H | 3.85533800  | -3.08829500 | -1.23164900 |
| H | 2.22440900  | 0.85489400  | -1.89975400 |
| H | 3.96970900  | 0.60070500  | -2.14491800 |
| H | 2.79362100  | -0.10337100 | -3.29317100 |
| H | 0.54387400  | 1.74341200  | -0.66776700 |
| O | 0.96966300  | 2.63468400  | -0.68811400 |
| C | 1.92253400  | 2.65431500  | 0.35680000  |
| H | 2.51320300  | 1.71647900  | 0.33556100  |
| C | 2.86044800  | 3.82173700  | 0.10605900  |
| C | 1.23898200  | 2.74822200  | 1.71541000  |
| H | 2.28969000  | 4.76402900  | 0.09076300  |
| H | 3.62820000  | 3.89174600  | 0.88995800  |
| H | 3.36386900  | 3.71022100  | -0.86589800 |

|   |             |             |            |
|---|-------------|-------------|------------|
| H | 0.56668900  | 1.89086000  | 1.86516900 |
| H | 1.97634400  | 2.74400200  | 2.53268100 |
| H | 0.64880100  | 3.67667400  | 1.77890400 |
| H | 0.98931700  | -0.27713700 | 0.81996800 |
| O | 1.51418000  | -0.47742800 | 1.62345900 |
| C | 1.50139800  | -1.87416600 | 1.85462000 |
| H | 2.23654200  | -2.36610600 | 1.18602000 |
| C | 1.93000000  | -2.10127400 | 3.29300600 |
| C | 0.13154900  | -2.46296500 | 1.55606500 |
| H | 1.20143300  | -1.64375300 | 3.98085700 |
| H | 2.00132500  | -3.17483700 | 3.51915700 |
| H | 2.91240000  | -1.64187200 | 3.47722700 |
| H | -0.10903400 | -2.32797500 | 0.49205600 |
| H | 0.10717000  | -3.54015300 | 1.77865000 |
| H | -0.64234100 | -1.95991100 | 2.15846500 |
